# Supplementary material for: Jerusalem artichoke inulin supplementation ameliorates hepatic lipid metabolism in type 2 diabetes mellitus mice by modulating the gut microbiota and fecal metabolome
Source: Royal Society of Chemistry journal article supplement (doi:10.1039/d2fo02051c), 2022-01-01
Supplement: d2fo02051c1.pdf [file d2fo02051c1.pdf]

**SUPPLEMENTARY DATA for**

**Jerusalem artichoke inulin supplementation ameliorates hepatic lipid metabolism in  
type 2 diabetes mellitus mice by modulating the gut microbiota and fecal metabolome**

Jianpeng Li<sup>‡ab</sup>, Siqiang Jia<sup>‡ab</sup>, Chao Yuan<sup>ab</sup>, Bin Yu<sup>ab</sup>, Zheng Zhang<sup>ab</sup>, Meng Zhao<sup>ab</sup>, Pengfei  
Liu<sup>ab</sup>, Xia Li<sup>\*c</sup>, Bo Cui<sup>\*ab</sup>

<sup>a</sup> State Key Laboratory of Biobased Material and Green Papermaking, Qilu University of  
Technology, Shandong Academy of Sciences, Jinan, 250353, China. E-mail:  
lixia5625@126.com, cuibopaper@163.com

<sup>b</sup> School of Food Science and Engineering, Qilu University of Technology, Shandong  
Academy of Sciences, Jinan, 250353, China.

<sup>c</sup> School of Bioengineering, Qilu University of Technology, Shandong Academy of Sciences,  
Jinan, 250353, China.

<sup>‡</sup> These authors contributed equally to this work.

\*Corresponding author: Xia Li, Bo Cui

E-mail: lixia5625@126.com, cuibopaper@163.com.

**Table S1** The ingredients and energy densities of the normal and high-fat diets.

| Ingredient                            | normal diet (D12450B) |             | high-fat diet (D12492) |             |
|---------------------------------------|-----------------------|-------------|------------------------|-------------|
|                                       | gm                    | <i>kcal</i> | gm                     | <i>kcal</i> |
| Casein, 80 Mesh                       | 200                   | 800         | 200                    | 800         |
| L-Cystine                             | 3                     | 12          | 3                      | 12          |
| Corn Starch                           | 315                   | 1260        | 0                      | 0           |
| Maltodextrin 10                       | 35                    | 140         | 125                    | 500         |
| Sucrose                               | 350                   | 1400        | 68.8                   | 272         |
| Cellulose, BW200                      | 50                    | 0           | 50                     | 0           |
| Soybean Oil                           | 25                    | 225         | 25                     | 225         |
| Lard                                  | 20                    | 180         | 245                    | 2205        |
| Mineral Mix S10026                    | 10                    | 0           | 10                     | 0           |
| DiCalcium Phosphate                   | 13                    | 0           | 13                     | 0           |
| Calcium Carbonate                     | 5.5                   | 0           | 5.5                    | 0           |
| Potassium Citrate, 1 H <sub>2</sub> O | 16.5                  | 0           | 16.5                   | 0           |
| Vitamin Mix V1001                     | 10                    | 40          | 10                     | 40          |
| Choline Bitartrate                    | 2                     | 0           | 2                      | 0           |
| FD&C Yellow Dye #5                    | 0.05                  | 0           | 0                      | 0           |
| FD&C Blue Dye #1                      | 0                     | 0           | 0.05                   | 0           |

**Note:** FD&C: A major subsidiary dye in U.S. certified Allura Red AC dye.

**Table S2** Primers sequences used for real-time quantitative PCR.

| Gene                            |         | Oligonucleotide sequence (5'-3') |
|---------------------------------|---------|----------------------------------|
| <i><math>\beta</math>-actin</i> | Forward | GTGCTATGTTGCTCTAGACTTCG          |
|                                 | Reverse | ATGCCACAGGATTCCATACC             |
| <i>Fas</i>                      | Forward | GCTCAGAAGGATTATATCAAGG           |
|                                 | Reverse | AGCACCAGTTCACAGATG               |
| <i>Gyk</i>                      | Forward | CCTGACAACCGTAGCATAT              |
|                                 | Reverse | CGAAGTAGCAGCCATAAGA              |
| <i>Scd1</i>                     | Forward | CCGTGGCTTCTTCTTCTC               |
|                                 | Reverse | AGGTGTGGTGGTAGTTGT               |
| <i>Ppar<math>\gamma</math></i>  | Forward | CCGAAGAACCATCCGATT               |
|                                 | Reverse | ACACCATACTTGAGCAGAG              |

*Fas*, fatty acid synthase; *Gyk*, glycerol kinase; *Scd1*, stearyl-CoA desaturase 1; *Ppar $\gamma$* , peroxisome proliferator-activated receptor gamma.
